# Supplementary material
Source: ML conference proceedings conference paper supplement (https://openaccess.thecvf.com/content/WACV2021/html/Xue_End-to-End_Chinese_Landscape_WACV_2021_paper.html)
Supplement: Supplementary file 1 [file Xue_End-to-End_Chinese_Landscape_WACV_2021_supplemental.pdf]

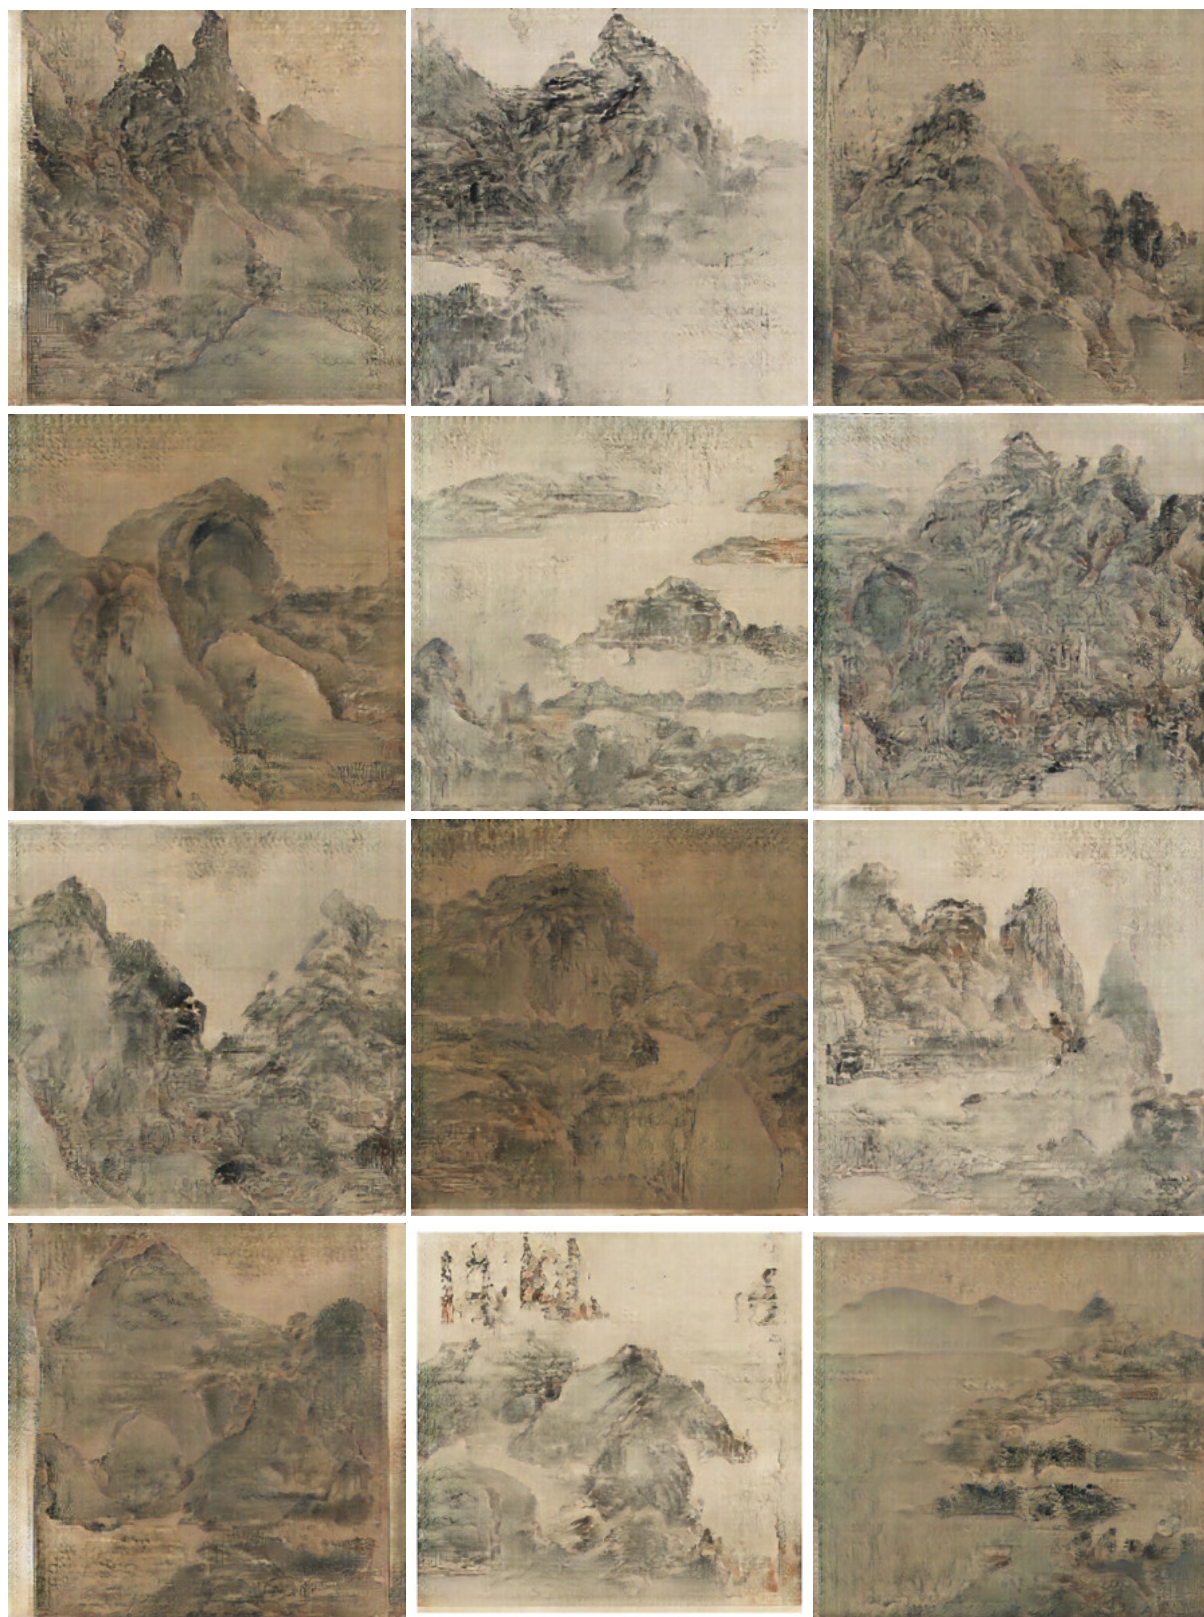

Figure 10. More paintings by SAPGAN (RaLSGAN sketch + Pix2Pix combination)



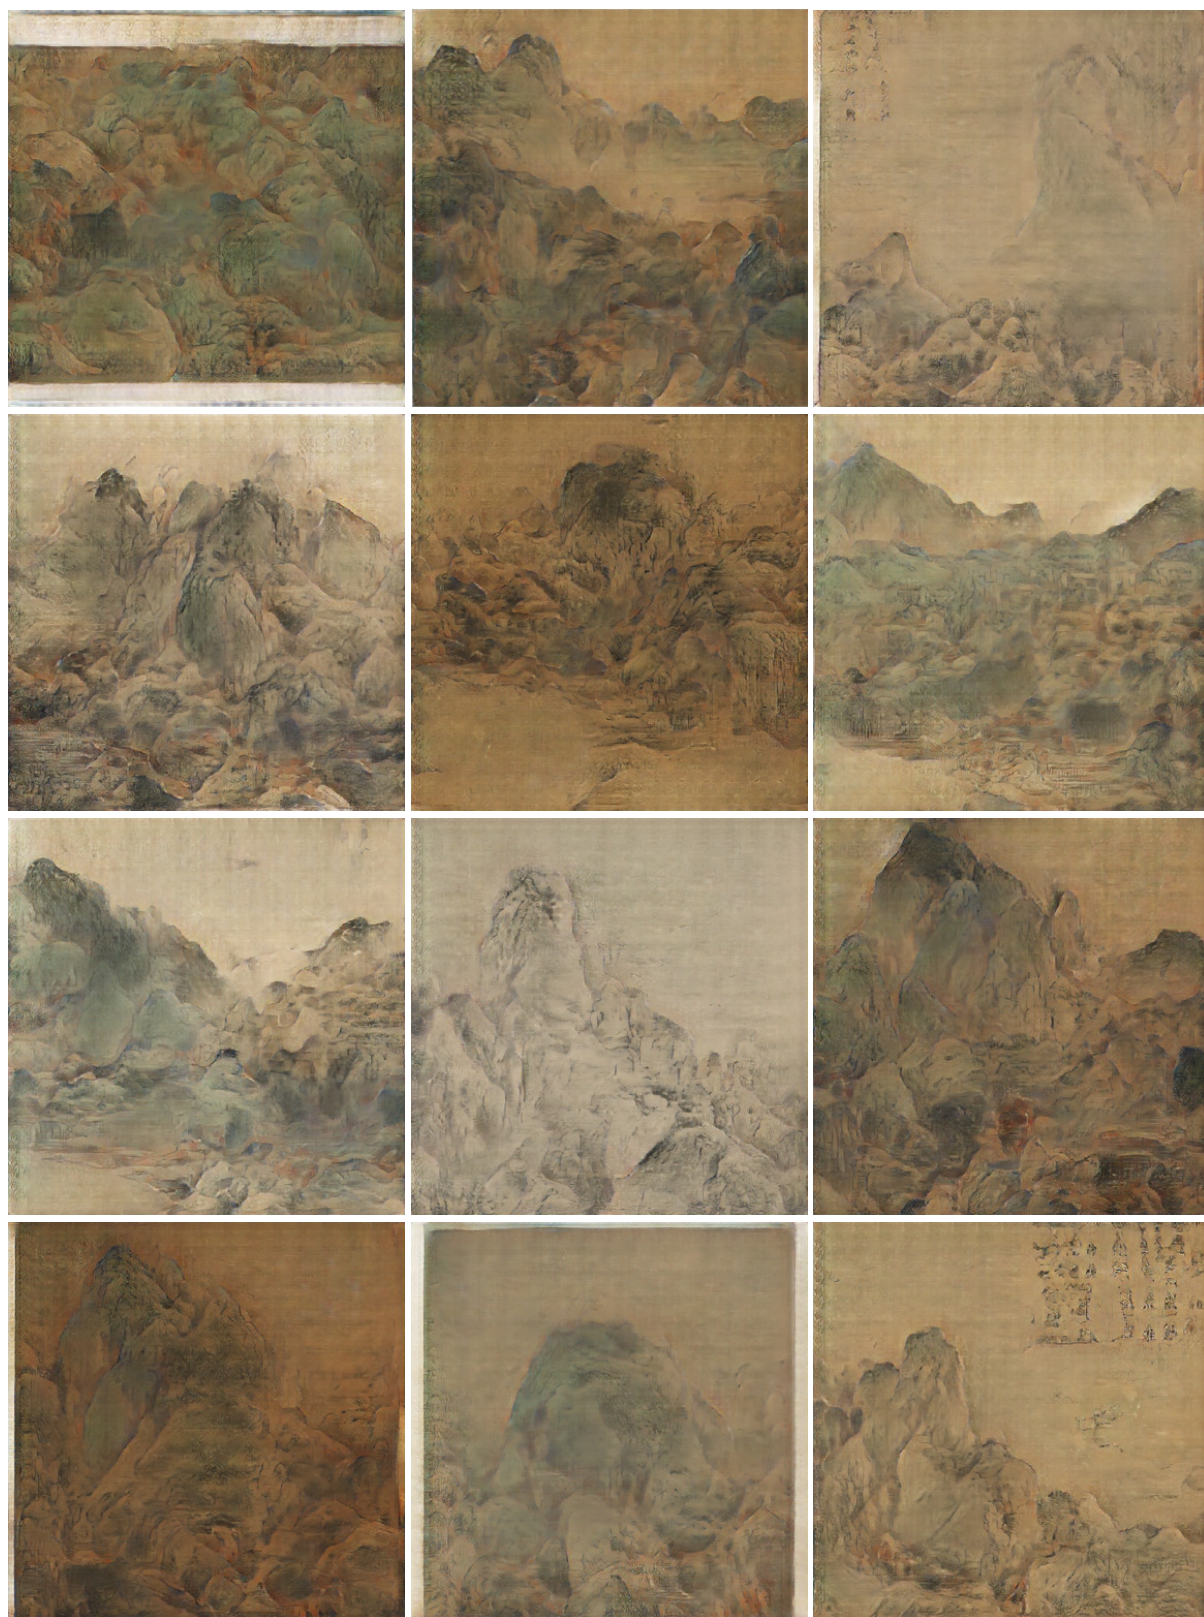

Figure 11. More paintings by SAPGAN (StyleGAN2 sketch + Pix2Pix combination)
